# Supplementary material
Source: publisher figshare collection journal article supplement (https://rs.figshare.com/ndownloader/files/17435774)
Supplement: Supplementary file 1 [file 17435774]

Name	Group	Sex	Age	fWHR	AssR	normDS	weight
Zuani	Apenheul	Female	22	1.475051975	5.36	1.43	24
Zuani	Apenheul	Female	22	1.321814255	5.36	1.43	24
Zorba	Wilhelma	Male	34	1.581445523	2.36	2.341
Zorba	Wilhelma	Male	34	1.479236813	2.36	2.341
Zorba	Wilhelma	Male	34	1.390086207	2.36	2.341
Zomi	Frankfurt	Female	15	1.340909091	3.92	3.087
Zomi	Frankfurt	Female	15	1.260869565	3.92	3.087
Zamba	Apenheul	Male	14	1.880866426	4.74	3.035	41.6
Zamba	Apenheul	Male	14	1.491452991	4.74	3.035	41.6
Zamba	Apenheul	Male	14	1.578947368	4.74	3.035	41.6
Vifijo	Planckendael	Male	18	1.351490236	2.68	2.165	38
Vifijo	Planckendael	Male	18	1.506261181	2.68	2.165	38
Vifijo	Planckendael	Male	18	1.468292683	2.68	2.165	38
Vifijo	Planckendael	Male	18	1.385714286	2.68	2.165	38
Vifijo	Planckendael	Male	18	1.501612903	2.68	2.165	38
Muhdeblu	Wuppertal	Female	12	1.364118896	2.62	2.943	36.5
Muhdeblu	Wuppertal	Female	12	1.381592554	2.62	2.943	36.5
Muhdeblu	Wuppertal	Female	12	1.269620253	2.62	2.943	36.5
Mobikisi	Wilhelma	Male	34	1.600529101	3.97	2.627	43.5
Mixi	Frankfurt	Female	11	1.919491525	4.12	3.944	36
Mixi	Frankfurt	Female	11	1.826446281	4.12	3.944	36
Mixi	Frankfurt	Female	11	1.572016461	4.12	3.944	36
Mato	Wuppertal	Male	49	1.534818942	5.38	4.421	50.6
Mato	Wuppertal	Male	49	1.60755814	5.38	4.421	50.6
Mato	Wuppertal	Male	49	1.798387097	5.38	4.421	50.6
Maringa	Twycross	Female	15	1.327433628	4.51	4.198
Maringa	Twycross	Female	15	1.428571429	4.51	4.198
Maringa	Twycross	Female	15	1.528550512	4.51	4.198
Maringa	Twycross	Female	15	1.517241379	4.51	4.198
Margrit	Frankfurt	Female	62	1.15896488	4.28	3.615	31
Margrit	Frankfurt	Female	62	1.237267081	4.28	3.615	31
Lusambo	Wuppertal	Male	32	1.590493601	5.27	4.333	41.5
Lusambo	Wuppertal	Male	32	1.532718121	5.27	4.333	41.5
Luo	Twycross	Male	10	1.317016317	3.26	4.147
Luo	Twycross	Male	10	1.42732049	3.26	4.147
Luo	Twycross	Male	10	1.427251732	3.26	4.147
Luo	Twycross	Male	10	1.555555556	3.26	4.147
Luo	Twycross	Male	10	1.687878788	3.26	4.147
Ludwig	Frankfurt	Male	29	1.454054054	2.51	4.262	53.3
Lucuma	Planckendael	Male	10	1.5	3.97	4.453
Lucuma	Planckendael	Male	10	1.591439689	3.97	4.453
Lucuma	Planckendael	Male	10	1.539170507	3.97	4.453
Lucuma	Planckendael	Male	10	1.72392638	3.97	4.453
Louisoko	Planckendael	Male	14	1.26459854	4.92	2.242
Louisoko	Planckendael	Male	14	1.341523342	4.92	2.242
Louisoko	Planckendael	Male	14	1.324275362	4.92	2.242
Lisala	Wuppertal	Female	32	1.718654434	5.69	3.442
Lisala	Wuppertal	Female	32	1.40201005	5.69	3.442
Lina	Planckendael	Female	27	1.323834197	5.38	1.722	33.8
Lina	Planckendael	Female	27	1.595410628	5.38	1.722	33.8
Lina	Planckendael	Female	27	1.543859649	5.38	1.722	33.8
Lina	Planckendael	Female	27	1.384753363	5.38	1.722	33.8
Lina	Planckendael	Female	27	1.391304348	5.38	1.722	33.8
Liboso	Wilhelma	Female	16	1.410669975	4.15	4.365	30
Liboso	Wilhelma	Female	16	1.415540541	4.15	4.365	30
Kutu	Frankfurt	Female	15	1.428023033	5.79	4.739
Kutu	Frankfurt	Female	15	1.512957317	5.79	4.739
Kutu	Frankfurt	Female	15	1.675599436	5.79	4.739
Kumbuka	Apenheul	Female	13	1.488706366	4.79	3.131	34.6
Kumbuka	Apenheul	Female	13	1.485714286	4.79	3.131	34.6
Kombote	Wilhelma	Female	48	1.485254692	5.97	1.36
Kombote	Wilhelma	Female	48	1.47972973	5.97	1.36
Kichele	Twycross	Female	24	1.453608247	4.87	3.044	38.5
Kichele	Twycross	Female	24	1.307599517	4.87	3.044	38.5
Kichele	Twycross	Female	24	1.545018647	4.87	3.044	38.5
Kichele	Twycross	Female	24	1.454351308	4.87	3.044	38.5
Keke	Twycross	Male	19	1.253588517	3.99	3.281
Keke	Twycross	Male	19	1.169117647	3.99	3.281
Keke	Twycross	Male	19	1.259803922	3.99	3.281
Kamiti	Frankfurt	Female	26	1.324324324	4.97	2.57	33.8
Kakowet	Twycross	Male	32	1.436532508	3.13	1.682	43.5
Kakowet	Twycross	Male	32	1.401933702	3.13	1.682	43.5
Kakowet	Twycross	Male	32	1.350806452	3.13	1.682	43.5
Kakowet	Twycross	Male	32	1.310126582	3.13	1.682	43.5
Hortense	Apenheul	Female	34	1.200652529	3.05	1.755	40
Hortense	Apenheul	Female	34	1.32421875	3.05	1.755	40
Hortense	Apenheul	Female	34	1.317880795	3.05	1.755	40
Hortense	Apenheul	Female	34	1.291839557	3.05	1.755	40
Hermien	Wilhelma	Female	36	1.436447167	5.74	2.257	43.2
Hermien	Wilhelma	Female	36	1.920318725	5.74	2.257	43.2
Hermien	Wilhelma	Female	36	1.272058824	5.74	2.257	43.2
Hermien	Wilhelma	Female	36	1.424928013	5.74	2.257	43.2
Eja	Wuppertal	Female	22	1.39953271	5	1.536	41
Eja	Wuppertal	Female	22	1.438679245	5	1.536	41
Eja	Wuppertal	Female	22	1.350282486	5	1.536	41
Eja	Wuppertal	Female	22	1.370030581	5	1.536	41
Eja	Wuppertal	Female	22	1.745065789	5	1.536	41
Eja	Wuppertal	Female	22	1.325	5	1.536	41
Djanoa	Planckendael	Female	18	1.450485437	5.15	2.386
Djanoa	Planckendael	Female	18	1.269503546	5.15	2.386
Djanoa	Planckendael	Female	18	1.251386322	5.15	2.386
Djanoa	Planckendael	Female	18	1.305882353	5.15	2.386
Diatou	Twycross	Female	36	1.224274406	5.64	1.073	39.2
Diatou	Twycross	Female	36	1.196787149	5.64	1.073	39.2
Diatou	Twycross	Female	36	1.35138539	5.64	1.073	39.2
Chimba	Wilhelma	Female	18	1.36761488	4.74	1.724
Chimba	Wilhelma	Female	18	1.386612022	4.74	1.724
Cheka	Twycross	Female	17	1.412413793	5.46	1.5
Cheka	Twycross	Female	17	1.280106454	5.46	1.5
Bondo	Frankfurt	Male	21	1.384401114	1.79	2.241	41.5
Bondo	Frankfurt	Male	21	1.04589372	1.79	2.241	41.5
Bondo	Frankfurt	Male	21	1.188349515	1.79	2.241	41.5
Bondo	Frankfurt	Male	21	1.76203966	1.79	2.241	41.5
Bolombo	Apenheul	Male	15	1.533870968	3.92	3.196
Bolombo	Apenheul	Male	15	1.308880309	3.92	3.196
Bolombo	Apenheul	Male	15	1.288590604	3.92	3.196
Birogu	Wuppertal	Male	23	1.668502203	4.92	1.122	44
Birogu	Wuppertal	Male	23	1.502890173	4.92	1.122	44
Birogu	Wuppertal	Male	23	1.632236095	4.92	1.122	44
Birogu	Wuppertal	Male	23	1.744	4.92	1.122	44
Banya	Twycross	Female	23	1.373806276	3.69	1.073
Banya	Twycross	Female	23	1.181914894	3.69	1.073
Banya	Twycross	Female	23	1.179487179	3.69	1.073
Banya	Twycross	Female	23	1.107019563	3.69	1.073
Banbo	Wilhelma	Female	11	1.444223108	3.46	2.368
Banbo	Wilhelma	Female	11	1.163652024	3.46	2.368
Banbo	Wilhelma	Female	11	1.338282763	3.46	2.368
